# Supplementary material for: One-pot synthesis of porous magnetic cellulose beads for the removal of metal ions
Source: Royal Society of Chemistry journal article supplement (doi:10.1039/c4ra05601a), 2014-07-04
Supplement: c4ra05601a1.pdf [file c4ra05601a1.pdf]

## Supporting Information

# One-pot Synthesis of Porous Magnetic Cellulose Bead for Pollutant Removal

*Xiaolin Yu<sup>†</sup>, Dongjuan Kang<sup>†</sup>, Yanyong Hu<sup>†</sup>, Changyan Cao<sup>‡</sup>, Weiguo Song<sup>‡</sup>, Shengrui Tong<sup>†\*</sup>,  
and Maofa Ge<sup>†\*</sup>*

<sup>†</sup>State Key Laboratory for Structural Chemistry of Unstable and Stable Species, Beijing National Laboratory for Molecular Sciences (BNLMS), Institute of Chemistry, Chinese Academy of Sciences, Beijing, 100190, P. R. China

<sup>‡</sup>Laboratory for Molecular Nanostructures and Nanotechnology, Institute of Chemistry, Chinese Academy of Sciences, Beijing 100190, P. R. China.

**\*Corresponding author:**

Email: [gemaofa@iccas.ac.cn](mailto:gemaofa@iccas.ac.cn); [tongsr@iccas.ac.cn](mailto:tongsr@iccas.ac.cn)

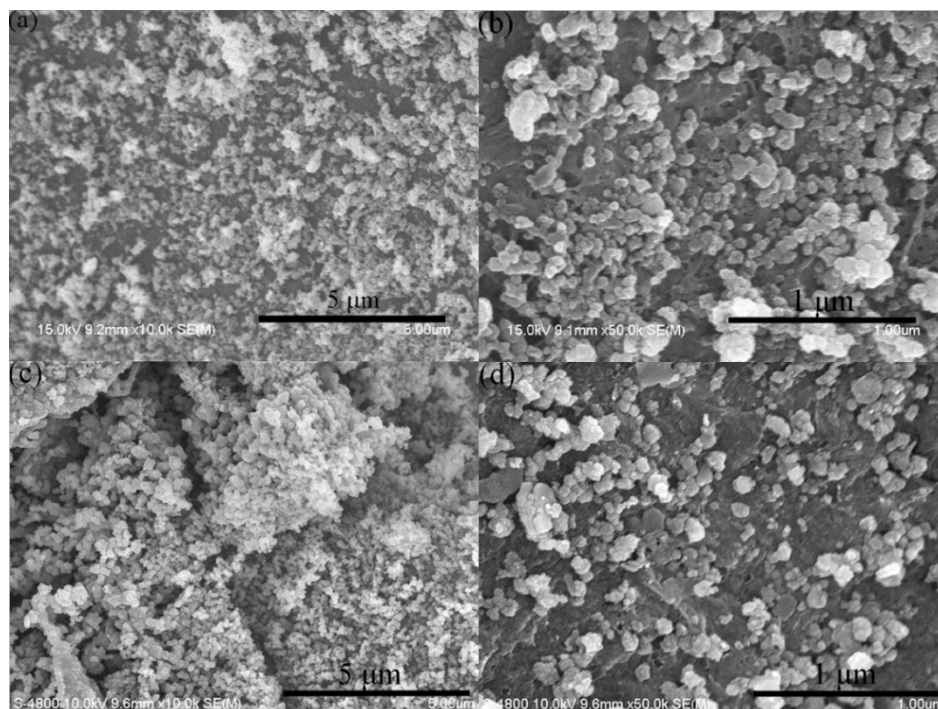

**Fig. S1** SEM images of MCB1 (a and b) and MCB3 (c and d).

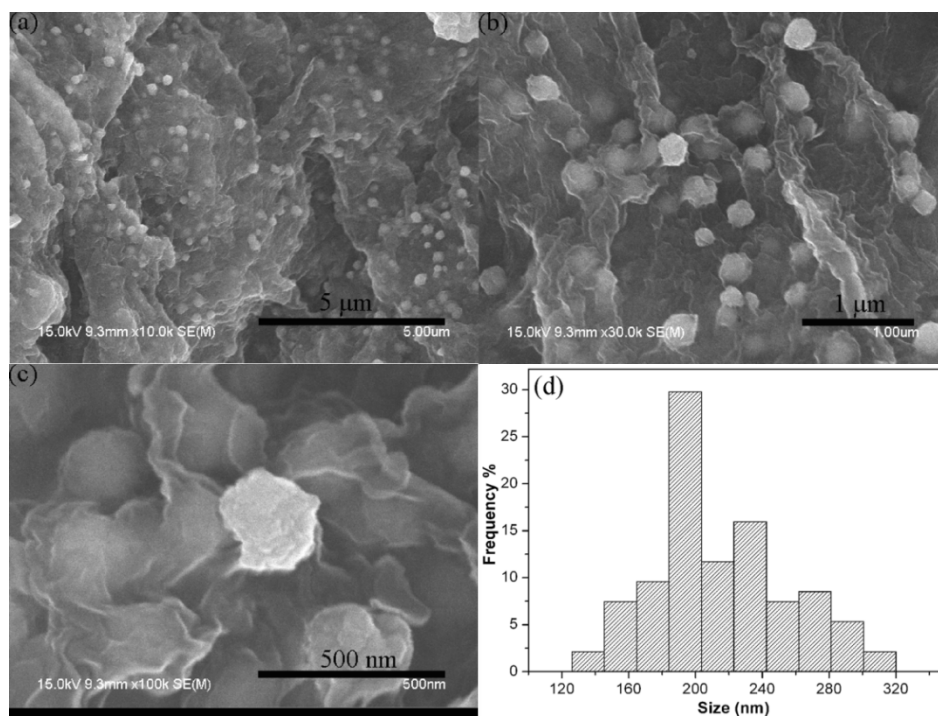

**Fig. S2** Cross-section SEM images of MCB1 (a, b and c) and size distribution of CoFe<sub>2</sub>O<sub>4</sub> nanoparticles (d).

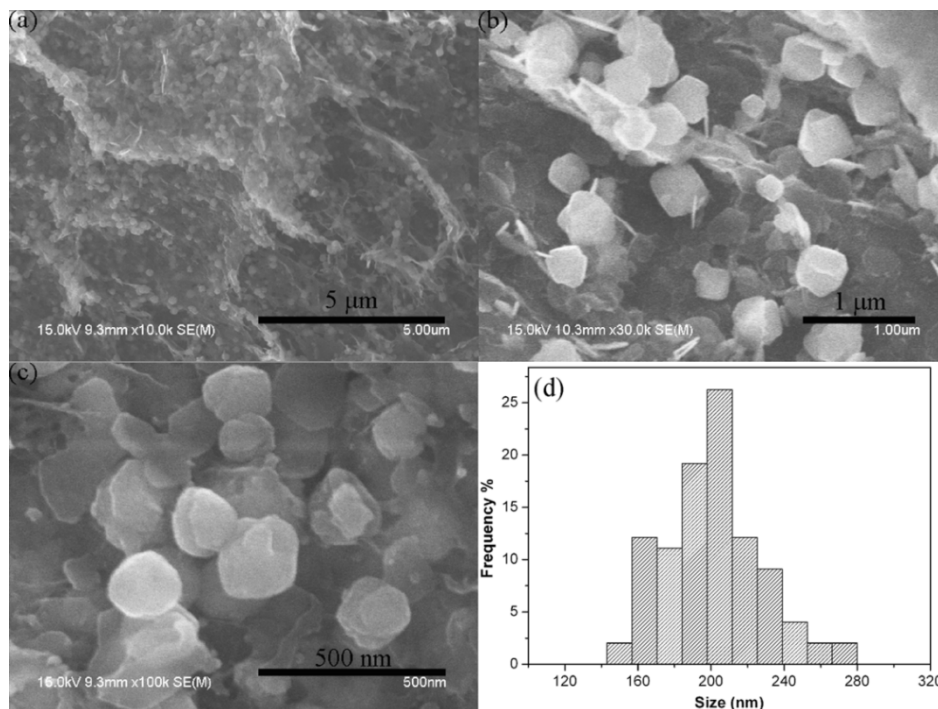

**Fig. S3** Cross-section SEM images of MCB3 (a, b and c) and size distribution of CoFe<sub>2</sub>O<sub>4</sub> nanoparticles (d).

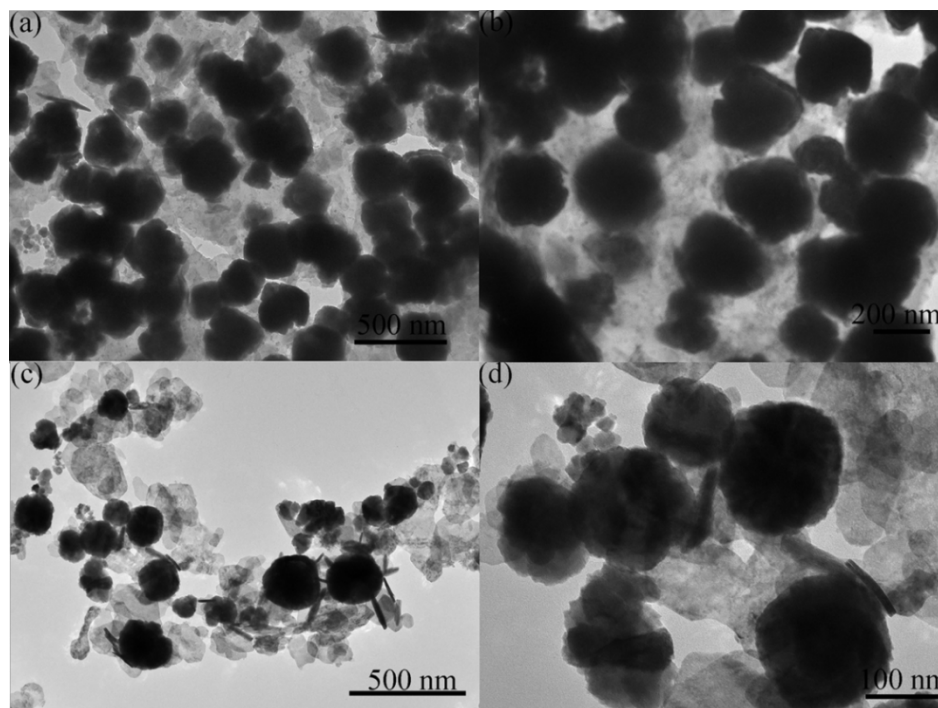

**Fig. S4** Low-magnification TEM images (a and c) and High-magnification TEM images (b and d) of MCB1 (a and b) and MCB3 (c and d).

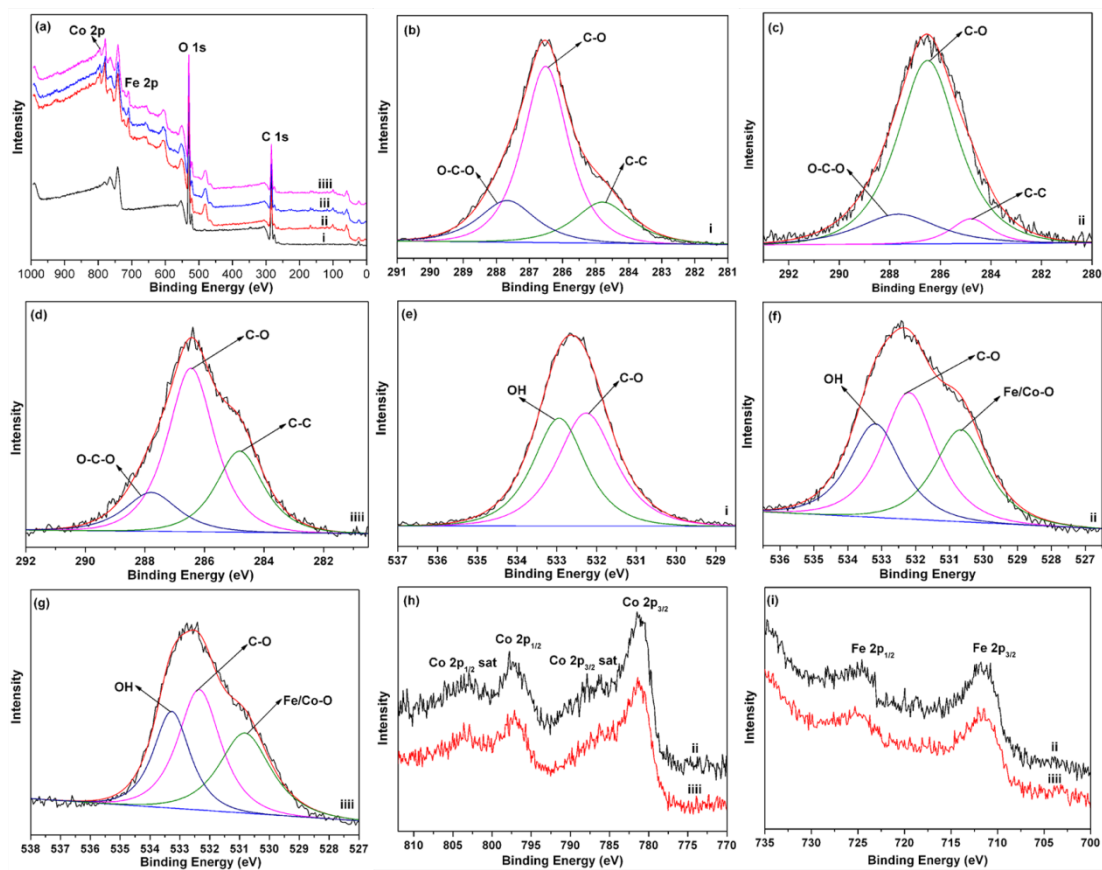

**Fig S5** The wide scan (a), C 1s (b, c and d), O 1s (e, f and g), Co 2p (h) and Fe 2p (i) XPS spectra of CB (i), MCB1 (ii), MCB2 (iii) and MCB3 (iiii).

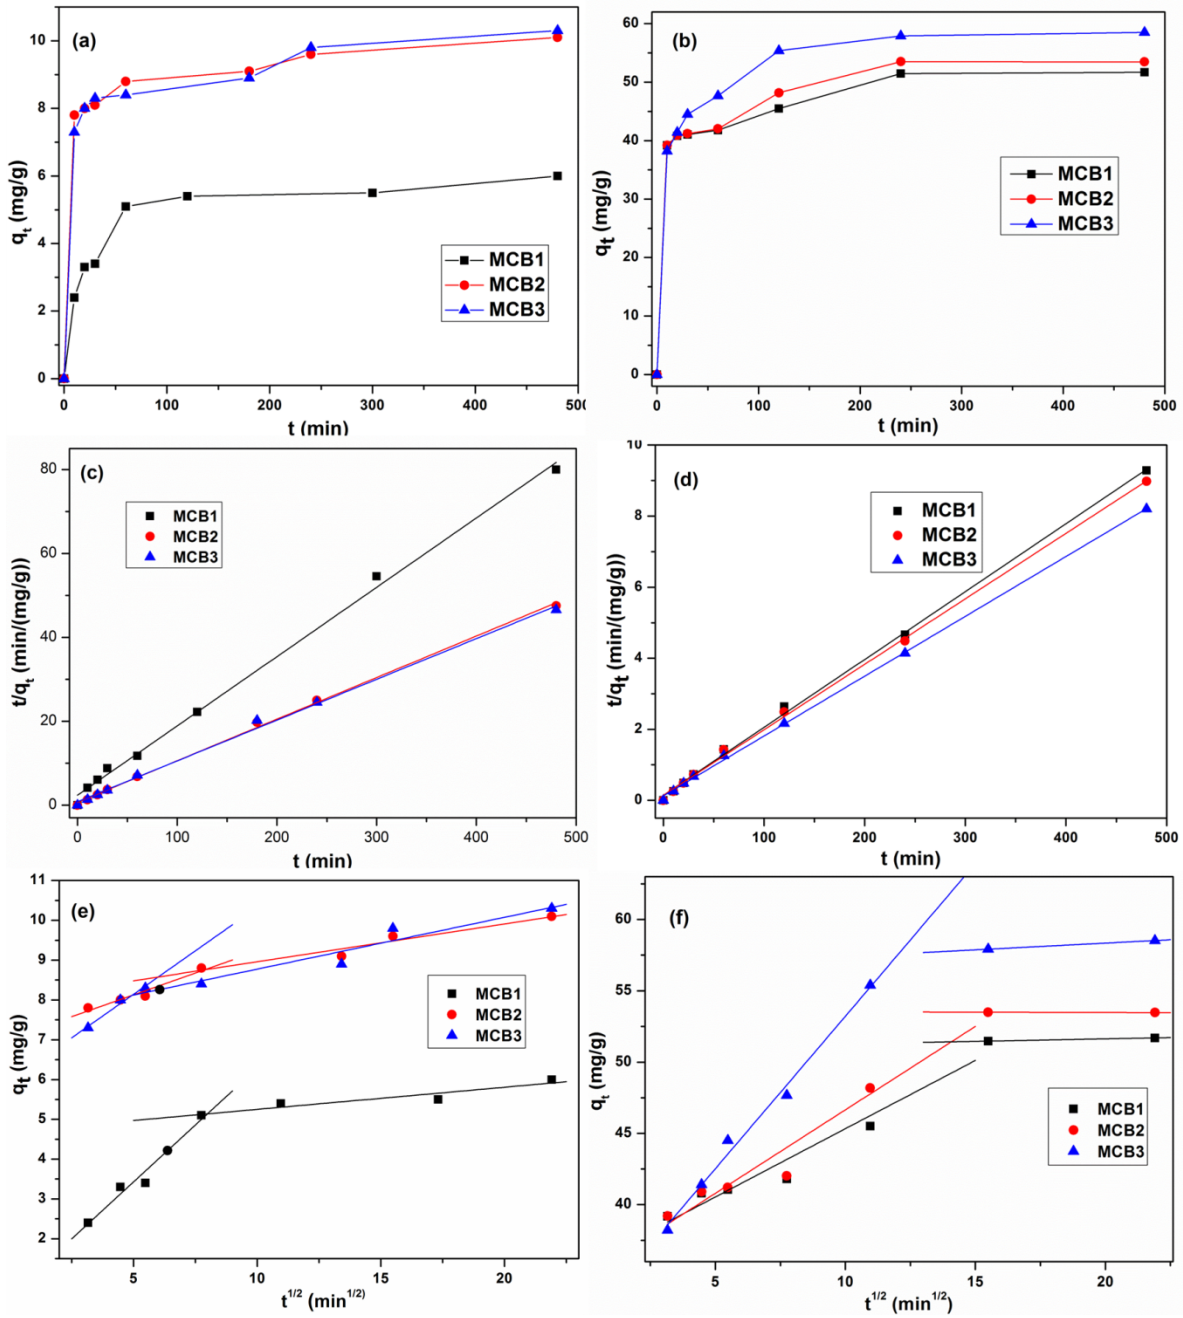

**Fig. S6** Effect of contact time on the adsorption of As(V) (a ) and Pb(II) (b); pseudo-second-order kinetic plots for the adsorption of As(V) (c) and Pb(II) (d); intra-particle diffusion plots for the adsorption of As(V) (e) and Pb(II) (f) (initial concentration As(V): 30 mg/L, Pb(II): 100 mg/L)

**Table S1.** Langmuir and Freundlich parameters of As(V) and Pb(II) on the MCB

|        | Langmuir         |            |         | Freundlich   |       |         |
|--------|------------------|------------|---------|--------------|-------|---------|
|        | $Q_{max}$ (mg/g) | $b$ (L/mg) | $R^2$   | $K_f$ (mg/g) | $n$   | $R^2$   |
| As(V)  |                  |            |         |              |       |         |
| MCB1   | 12.70            | 0.047      | 0.98153 | 1.08         | 1.79  | 0.96227 |
| MCB2   | 17.90            | 0.1414     | 0.97065 | 3.83         | 2.54  | 0.90773 |
| MCB3   | 20.27            | 0.080      | 0.98781 | 2.65         | 2.001 | 0.95731 |
| Pb(II) |                  |            |         |              |       |         |
| MCB1   | 70.43            | 0.42       | 0.97996 | 24.82        | 4.63  | 0.93679 |
| MCB2   | 87.30            | 0.48       | 0.98542 | 30.87        | 4.62  | 0.89472 |
| MCB3   | 97.29            | 0.48       | 0.97495 | 33.25        | 4.47  | 0.89906 |
